# Supplementary material
Source: PubMed Central journal article supplement (PMC2762749)
Supplement: NIHMS119792-supplement-1_si_001.pdf [file NIHMS119792-supplement-1_si_001.pdf]

SUPPORTING INFORMATION FOR:  
**Inhibitor Binding of Group IVA Phospholipase A<sub>2</sub> Probed by Molecular  
Dynamics and Deuterium Exchange Mass Spectrometry**

*John E. Burke,<sup>†</sup> Arneh Babakhani,<sup>†</sup> Alemayehu A. Gorfe,<sup>†</sup> George Kokotos,<sup>γ</sup> Sheng Li,<sup>‡</sup> Virgil L.  
Woods,<sup>§</sup> J. Andrew McCammon,<sup>†||±</sup> and Edward A. Dennis<sup>\*†||</sup>*

<sup>†</sup>Department of Chemistry and Biochemistry, <sup>‡</sup>Biomedical Sciences Graduate Program, <sup>§</sup>School of  
Medicine, <sup>||</sup>Department of Pharmacology, <sup>±</sup>Howard Hughes Medical Institute, University of California,  
San Diego, 9500 Gilman Dr MC 0601, La Jolla, California 92093-0601

<sup>γ</sup>Department of Chemistry, University of Athens, Panepistimiopolis, Athens 15771, Greece

\*Corresponding author. EAD: Phone, 858-534-3055; FAX, 858-534-7390; E-mail, [edennis@ucsd.edu](mailto:edennis@ucsd.edu)

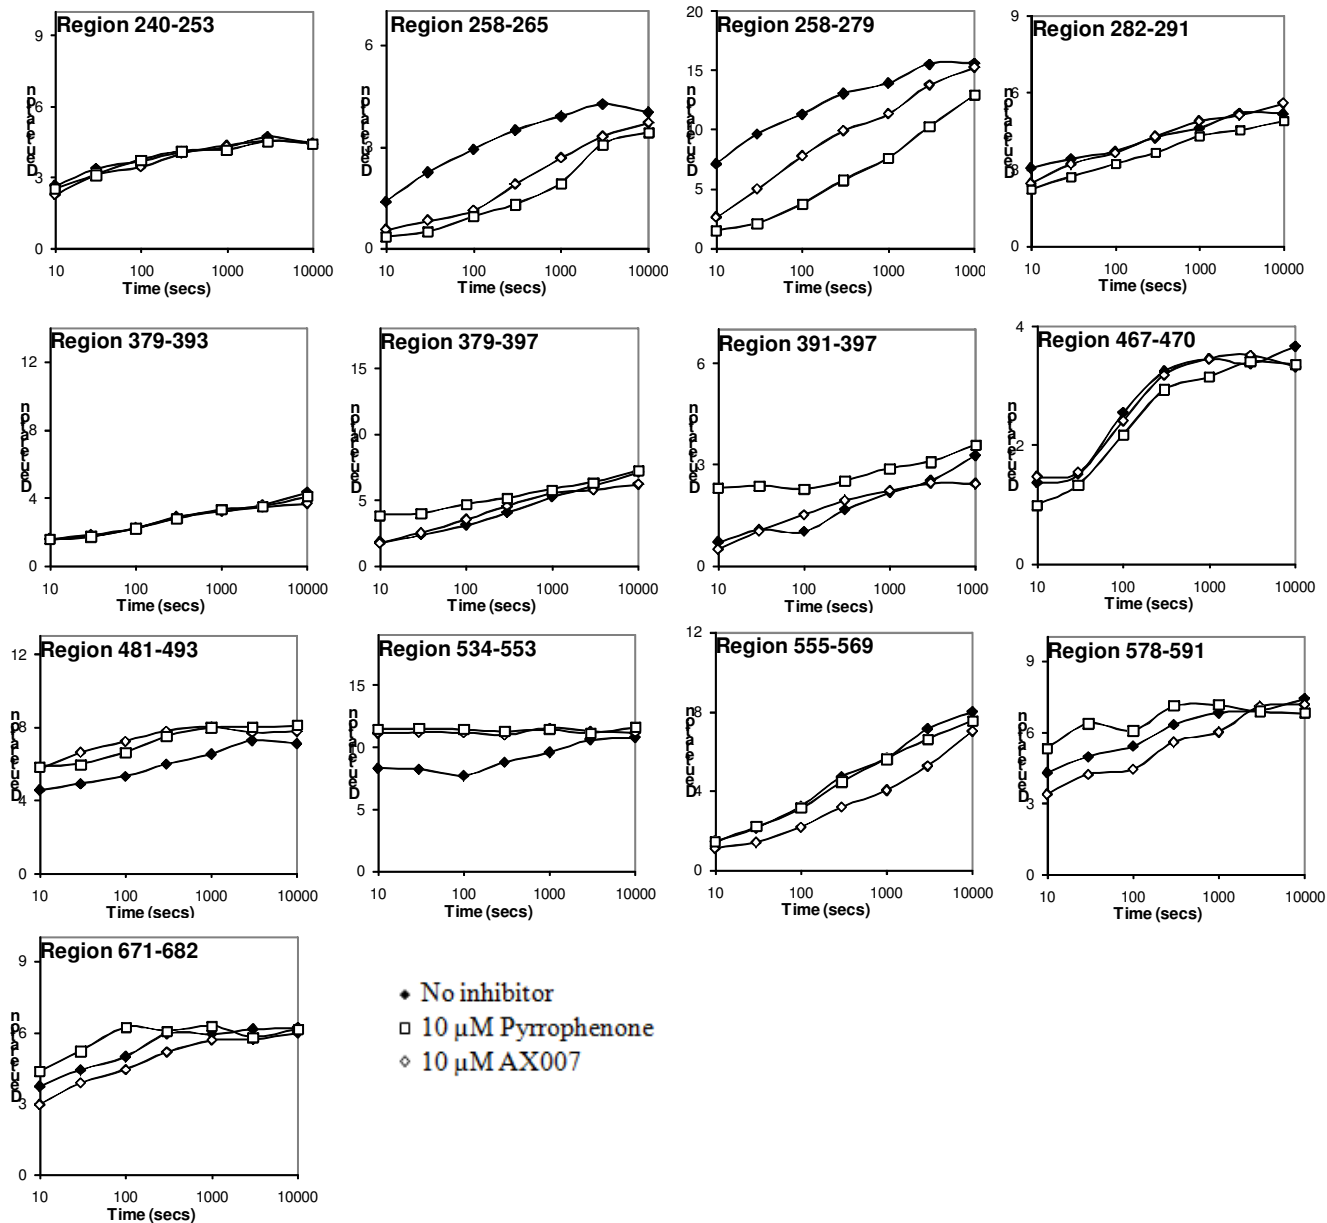

**Supplemental Figure 1 Deuterium exchange upon binding of 10  $\mu$ M pyrrophenone or AX007.** The number of incorporated deuterons at seven time points are displayed in peptides that overlap peptides displayed in Figures 3 and 5. Peptides 240-253, and 379-393 are given as examples of peptides with no change in exchange upon inhibitor binding.

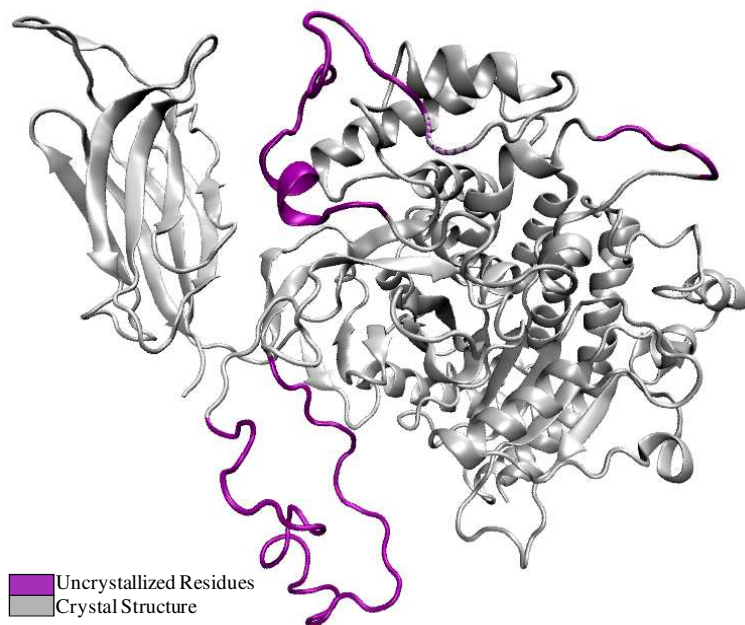

**Supplemental Figure 2 Modeling uncrystallized residues in PLA<sub>2</sub>.** The residues without defined electron density in the crystallographic structure were modeled and are shown in purple.

## GIVA PLA<sub>2</sub> Protein Digest Map

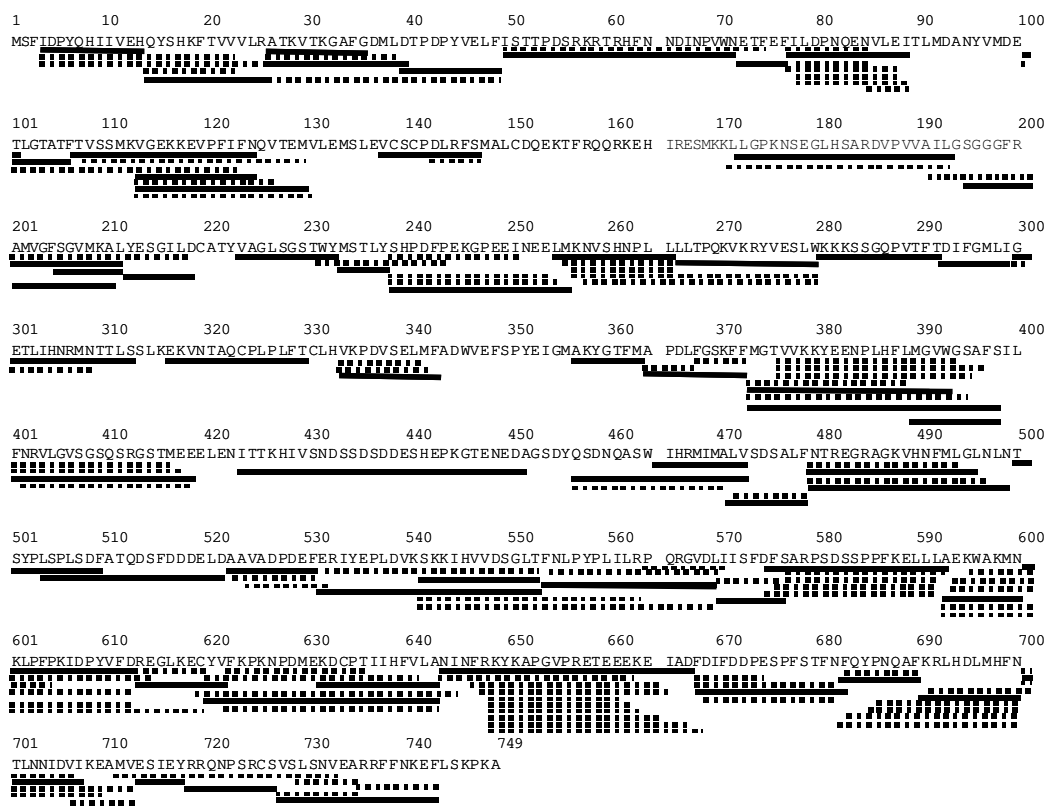

**Supplemental Figure 3 Peptide digest map of GIVA PLA<sub>2</sub>.** Identified and analyzed peptides resulting from pepsin-digestion are shown below the primary sequence of GIVA PLA<sub>2</sub>. All peptides were analyzed, but to prevent redundancy only the peptides shown as solid lines were used in this study.

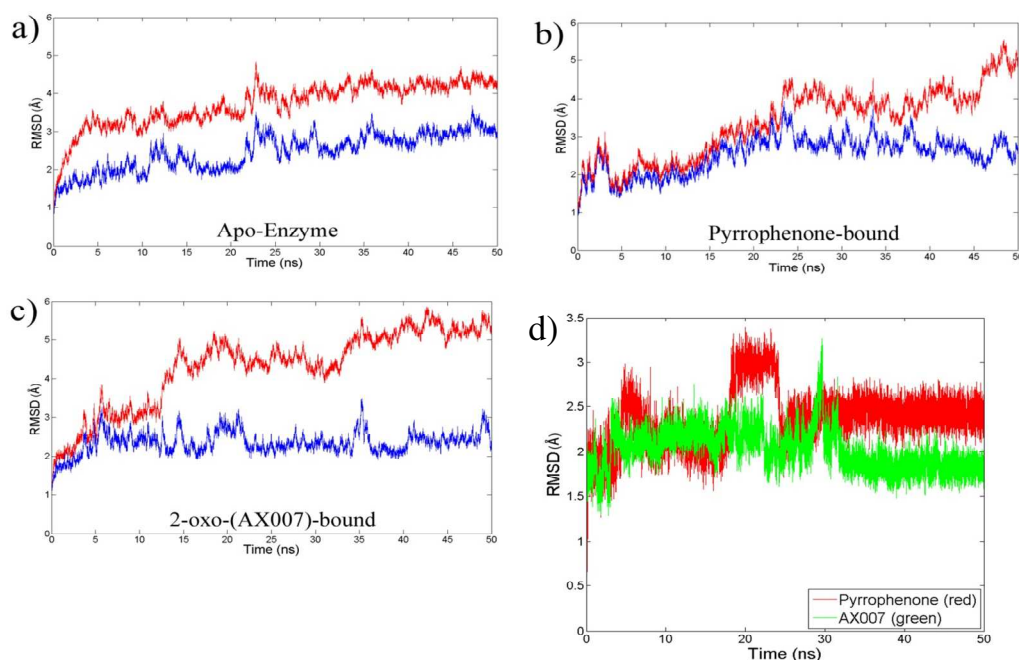

**Supplemental Figure 4 Root mean square distance of protein and inhibitor.** For all C<sub>α</sub> RMSD measurements the red represents the RMSD of all residues, with crystallized residues RMSD shown in blue (excluding 407-414, 431-462, 498-538, and 626-632). a) The RMSD of the C<sub>α</sub> in the apoenzyme over the simulation time course (50 ns). b) The RMSD of the C<sub>α</sub> in the pyrrophenone bound enzyme. c) The RMSD of the C<sub>α</sub> in the oxoamide bound enzyme. d) The RMSD values of both the oxoamide (green) and pyrrophenone (red) over the simulation time course is plotted.

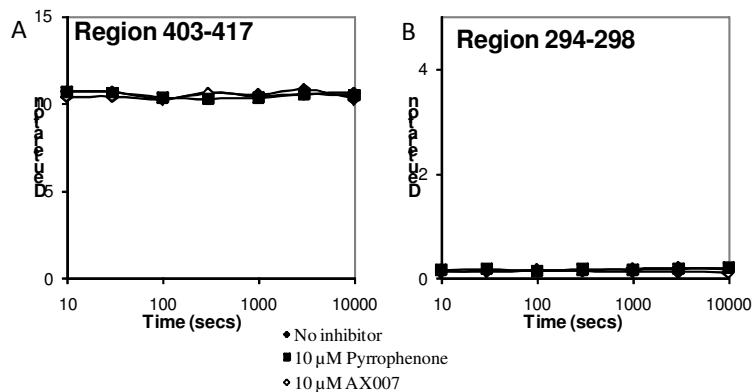

**Supplemental Figure 5 Regions in contact with inhibitors with extremely fast or slow rates of exchange.** Region 403-417 (A) and 294-298 (B) are plotted showing extremely fast rates of exchange (region 403-417), or extremely slow rates (region 294-298), with or without pyrrophenone or oxoamide present.
